# Supplementary material for: Achieving high molecular weight alternating copolymers of 1-octene with methyl acrylate via Lewis acid catalyzed copolymerization
Source: Royal Society of Chemistry journal article supplement (doi:10.1039/d4ra00165f), 2024-01-01
Supplement: d4ra00165f1.pdf [file d4ra00165f1.pdf]

# Supporting Information

Achieving High Molecular Weight Alternating Copolymers of 1-Octene  
with Methyl Acrylate via Lewis Acid Catalyzed Copolymerization

Jiefan Wan, Yi Dan, Yun Huang, Long Jiang\*

State Key Laboratory of Polymer Materials Engineering of China (Sichuan  
University), Polymer Research Institute of Sichuan University, Chengdu 610065,  
China

# Supporting Information

## Contents

### Effect of different Sc(OTf)<sub>3</sub> dosage on <sup>13</sup>C NMR Chemical shift of MA

Table S1. Effect of different Sc(OTf)<sub>3</sub> dosage on <sup>13</sup>C NMR Chemical shift of MA. S2

### Copolymer Constitutions of MA, 1-octene and 1,7-octadiene

Table S2. Copolymer Constitutions at Different 1,7-Octadiene Addition Amount. S3

Table S3. Copolymer Constitutions of Relationship between molecular weight of copolymer and gel content. S5

### <sup>13</sup>C, <sup>1</sup>H NMR spectrum of copolymer

1) Figure S1. <sup>13</sup>C NMR spectrum of copolymer of MA-1-octene-1,7-octadiene and MA-1-octene with different Sc(OTf)<sub>3</sub> dosage. S6

2) Figure S2. <sup>1</sup>H NMR spectrum of copolymer of MA, 1-hexene and 1,7-octadiene in CDCl<sub>3</sub>. S7

3) Figure S3. <sup>1</sup>H NMR spectrum of copolymer of MA, 1-decene and 1,7-octadiene in CDCl<sub>3</sub>. S8

4) Figure S4. <sup>1</sup>H NMR spectrum of copolymer of MA, 1-tetradecane and 1,7-octadiene in CDCl<sub>3</sub>. S9

### GPC curves of copolymer

1) GPC curves of copolymers with different 1,7-octadiene/MA molar ratio. S10

### The equations for calculating the composition of the obtained copolymer

1) Equation S1. The equations for calculating the composition of the obtained MA, 1-octene and 1,7-octadiene copolymer. S11

2) Equation S2. The equations for calculating the composition of the obtained MA, 1-hexene and 1,7-octadiene copolymer. S11

3) Equation S3. The equations for calculating the composition of the obtained MA, 1-decene and 1,7-octadiene copolymer. S11

4) Equation S4. The equations for calculating the composition of the obtained MA, 1-tetradecane and 1,7-octadiene copolymer. S12

Table S1. Effect of different Sc(OTf)<sub>3</sub> dosage on <sup>13</sup>C NMR Chemical shift of MA.

| carbon | n(Sc(OTf) <sub>3</sub> )/n(MA) | Chemical shift(ppm) | Δδ(ppm) <sup>a</sup> |
|--------|--------------------------------|---------------------|----------------------|
|        | 0                              | 130.57              | /                    |
| 1      | 0.1                            | 131.88              | 1.31                 |
|        | 0.3                            | 135.40              | 4.83                 |
|        | 0                              | 128.06              | /                    |
| 2      | 0.1                            | 127.67              | 0.39                 |
|        | 0.3                            | 126.75              | 1.31                 |
|        | 0                              | 166.49              | /                    |
| 3      | 0.1                            | 167.58              | 1.09                 |
|        | 0.3                            | 170.62              | 4.13                 |
|        | 0                              | 51.50               | /                    |
| 4      | 0.1                            | 52.19               | 0.69                 |
|        | 0.3                            | 54.36               | 2.86                 |

a: Δδ represents the change in chemical shift of MA after adding different molar ratios of Sc(OTf)<sub>3</sub>.

Table S2. Copolymer Constitutions at Different 1,7-Octadiene Addition Amount.

| #  | n(1,7-octadiene)/<br>n(MA) | n(Initiator)/<br>n(Monomer)<br>(%) | n(Sc(OTf) <sub>3</sub> )/<br>n(MA) | Solvent                         | Solvent<br>amount<br>(ml) | Temp.<br>(°C) | F <sub>1-octene</sub><br>(%) | F <sub>MA</sub><br>(%) | M <sub>n</sub> ×10 <sup>-4</sup><br>(g/mol) | M <sub>w</sub> ×10 <sup>-4</sup><br>(g/mol) | PDI <sup>b</sup> |
|----|----------------------------|------------------------------------|------------------------------------|---------------------------------|---------------------------|---------------|------------------------------|------------------------|---------------------------------------------|---------------------------------------------|------------------|
| 1  | 0.00                       | 0.1                                | 0.1                                | CH <sub>2</sub> Cl <sub>2</sub> | 50                        | 45            | 48.50                        | 51.50                  | 2.59                                        | 4.34                                        | 1.68             |
| 2  | 0.00                       | 0.1                                | 0.2                                | CH <sub>2</sub> Cl <sub>2</sub> | 50                        | 45            | 43.00                        | 57.00                  | 2.85                                        | 5.28                                        | 1.85             |
| 3  | 0.00                       | 0.3                                | 0.1                                | CH <sub>2</sub> Cl <sub>2</sub> | 50                        | 45            | 45.04                        | 54.96                  | 2.16                                        | 3.82                                        | 1.77             |
| 4  | 0.00                       | 0.3                                | 0.2                                | CH <sub>2</sub> Cl <sub>2</sub> | 50                        | 45            | 42.43                        | 57.57                  | 3.17                                        | 5.71                                        | 1.80             |
| 5  | 0.00                       | 0.5                                | 0.1                                | CH <sub>2</sub> Cl <sub>2</sub> | 50                        | 45            | 43.46                        | 56.54                  | 1.84                                        | 3.64                                        | 1.98             |
| 6  | 0.00                       | 0.5                                | 0.1                                | CH <sub>2</sub> Cl <sub>2</sub> | 50                        | 45            | 45.43                        | 54.57                  | 1.79                                        | 3.20                                        | 1.79             |
| 7  | 0.00                       | 0.5                                | 0.2                                | CH <sub>2</sub> Cl <sub>2</sub> | 50                        | 45            | 42.24                        | 57.76                  | 2.34                                        | 4.63                                        | 1.98             |
| 8  | 0.01                       | 0.05                               | 0.1                                | PhCl                            | 30                        | 60            | 38.28                        | 60.90                  | 4.77                                        | 8.78                                        | 1.84             |
| 9  | 0.01                       | 0.1                                | 0.1                                | PhCl                            | 30                        | 60            | 38.53                        | 60.87                  | 4.17                                        | 8.32                                        | 1.99             |
| 10 | 0.01                       | 0.1                                | 0.1                                | PhCl                            | 30                        | 50            | 40.95                        | 58.33                  | 6.77                                        | 13.45                                       | 1.99             |
| 11 | 0.01                       | 0.1                                | 0.1                                | PhCl                            | 50                        | 60            | 38.47                        | 60.96                  | 4.09                                        | 8.72                                        | 2.13             |
| 12 | 0.01                       | 0.1                                | 0.1                                | PhCl                            | 50                        | 50            | 37.46                        | 62.09                  | 5.72                                        | 10.53                                       | 1.84             |
| 13 | 0.01                       | 0.1                                | 0.1                                | PhCl                            | 90                        | 50            | 38.65                        | 60.46                  | 5.75                                        | 10.92                                       | 1.89             |
| 14 | 0.01                       | 0.1                                | 0.1                                | 1,4-Dioxane                     | 30                        | 40            | 35.43                        | 63.69                  | 6.17                                        | 10.50                                       | 1.70             |
| 15 | 0.03                       | 0.1                                | 0.1                                | CH <sub>2</sub> Cl <sub>2</sub> | 50                        | 45            | 40.86                        | 59.10                  | 4.22                                        | 7.33                                        | 1.73             |
| 16 | 0.03                       | 0.1                                | 0.1                                | PhCl                            | 50                        | 60            | 40.18                        | 59.60                  | 4.48                                        | 9.60                                        | 2.14             |

(Continued table on the following page)

(Table S2 continued)

| #  | n(1,7-octadiene)/<br>n(MA) | n(Initiator)/<br>n(Monomer)<br>(%) | n(Sc(OTf) <sub>3</sub> )/<br>n(MA) | Solvent                         | Solvent<br>amount<br>(ml) | Temp.<br>(°C) | F <sub>1-octene</sub><br>(%) | F <sub>MA</sub><br>(%) | M <sub>n</sub> ×10 <sup>-4</sup><br>(g/mol) | M <sub>w</sub> ×10 <sup>-4</sup><br>(g/mol) | PDI <sup>b</sup> |
|----|----------------------------|------------------------------------|------------------------------------|---------------------------------|---------------------------|---------------|------------------------------|------------------------|---------------------------------------------|---------------------------------------------|------------------|
| 17 | 0.03                       | 0.1                                | 0.2                                | CH <sub>2</sub> Cl <sub>2</sub> | 50                        | 45            | 41.31                        | 57.89                  | 3.84                                        | 7.89                                        | 2.05             |
| 18 | 0.03                       | 0.5                                | 0.1                                | PhCl                            | 50                        | 60            | 39.80                        | 60.06                  | 3.86                                        | 8.65                                        | 2.24             |
| 19 | 0.03                       | 0.5                                | 0.2                                | PhCl                            | 50                        | 60            | 41.25                        | 58.07                  | 2.87                                        | 6.38                                        | 2.22             |
| 20 | 0.04                       | 0.1                                | 0.1                                | CH <sub>2</sub> Cl <sub>2</sub> | 50                        | 45            | 49.71                        | 49.37                  | 3.01                                        | 5.56                                        | 1.84             |
| 21 | 0.04                       | 0.1                                | 0.2                                | CH <sub>2</sub> Cl <sub>2</sub> | 50                        | 45            | 42.34                        | 56.80                  | 4.12                                        | 8.40                                        | 2.04             |
| 22 | 0.04                       | 0.5                                | 0.1                                | PhCl                            | 50                        | 60            | 38.15                        | 60.31                  | 2.93                                        | 8.37                                        | 2.86             |
| 23 | 0.04                       | 0.5                                | 0.2                                | PhCl                            | 50                        | 60            | 40.82                        | 57.19                  | 2.41                                        | 6.34                                        | 2.63             |
| 24 | 0.05                       | 0.1                                | 0.1                                | CH <sub>2</sub> Cl <sub>2</sub> | 50                        | 45            | 40.31                        | 58.80                  | 3.81                                        | 7.49                                        | 1.96             |
| 25 | 0.05                       | 0.1                                | 0.2                                | CH <sub>2</sub> Cl <sub>2</sub> | 50                        | 45            | 43.47                        | 55.66                  | 3.83                                        | 8.12                                        | 2.12             |
| 26 | 0.05                       | 0.1                                | 0.2                                | CH <sub>2</sub> Cl <sub>2</sub> | 50                        | 45            | 38.74                        | 60.43                  | 3.92                                        | 10.88                                       | 2.84             |
| 27 | 0.05                       | 0.5                                | 0.1                                | PhCl                            | 50                        | 60            | 38.83                        | 60.14                  | 3.56                                        | 8.82                                        | 2.48             |
| 28 | 0.05                       | 0.5                                | 0.2                                | PhCl                            | 50                        | 60            | 40.45                        | 58.05                  | 2.28                                        | 5.45                                        | 2.39             |

Table S3. Copolymer Constitutions of Relationship between molecular weight of copolymer and gel content.

| #  | n(1,7-octadiene)/<br>n(MA) | n(Initiator)/<br>n(Monomer)<br>(%) | n(Sc(OTf) <sub>3</sub> )/<br>n(MA) | Solvent | Solvent amount<br>(ml) | Temp.<br>(°C) | M <sub>n</sub> ×10 <sup>-4</sup><br>(g/mol) | Gel<br>(g) |
|----|----------------------------|------------------------------------|------------------------------------|---------|------------------------|---------------|---------------------------------------------|------------|
| 1  | 0.005                      | 0.1                                | 0.1                                | PhCl    | 30                     | 50            | 5.92                                        | 0.24       |
| 2  | 0.01                       | 0.05                               | 0.1                                | PhCl    | 30                     | 60            | 4.77                                        | 0.69       |
| 3  | 0.01                       | 0.1                                | 0.1                                | PhCl    | 50                     | 60            | 4.09                                        | 0.82       |
| 4  | 0.01                       | 0.1                                | 0.1                                | PhCl    | 30                     | 60            | 4.17                                        | 0.81       |
| 5  | 0.01                       | 0.1                                | 0.1                                | PhCl    | 50                     | 50            | 5.72                                        | 0.40       |
| 6  | 0.01                       | 0.1                                | 0.1                                | PhCl    | 30                     | 50            | 7.07                                        | 0.42       |
| 7  | 0.01                       | 0.1                                | 0.1                                | PhCl    | 30                     | 50            | 6.77                                        | 0.45       |
| 8  | 0.01                       | 0.1                                | 0.1                                | PhCl    | 90                     | 50            | 5.75                                        | 0.54       |
| 9  | 0.03                       | 0.1                                | 0.1                                | PhCl    | 50                     | 60            | 4.48                                        | 0.55       |
| 10 | 0.03                       | 0.5                                | 0.1                                | PhCl    | 50                     | 60            | 3.86                                        | 0.32       |
| 11 | 0.03                       | 0.5                                | 0.2                                | PhCl    | 50                     | 60            | 2.87                                        | 1.53       |
| 12 | 0.04                       | 0.5                                | 0.1                                | PhCl    | 50                     | 60            | 2.93                                        | 0.52       |
| 13 | 0.04                       | 0.5                                | 0.2                                | PhCl    | 50                     | 60            | 2.41                                        | 1.33       |
| 14 | 0.05                       | 0.5                                | 0.1                                | PhCl    | 50                     | 60            | 3.56                                        | 0.50       |
| 15 | 0.05                       | 0.5                                | 0.2                                | PhCl    | 50                     | 60            | 2.28                                        | 1.84       |

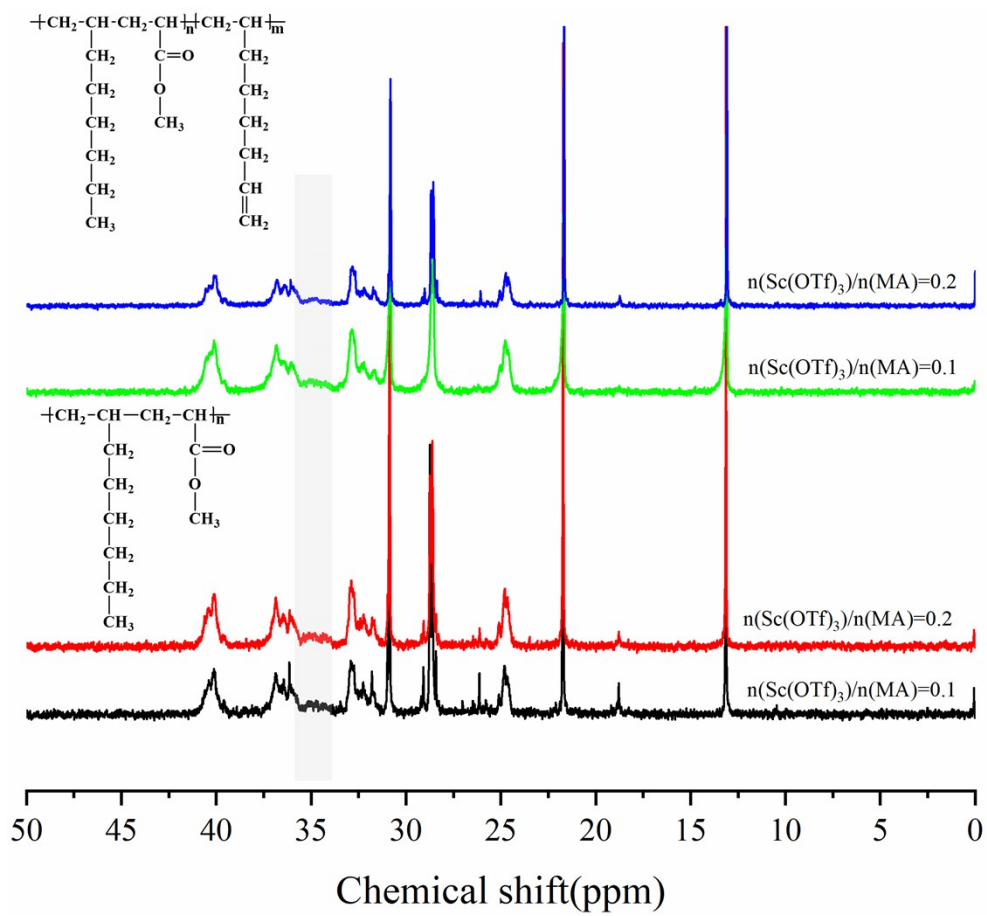

Figure S1.  $^{13}\text{C}$  NMR spectrum of copolymer of MA-1-octene-1,7-octadiene and MA-1-octene with different  $\text{Sc}(\text{OTf})_3$  dosage.

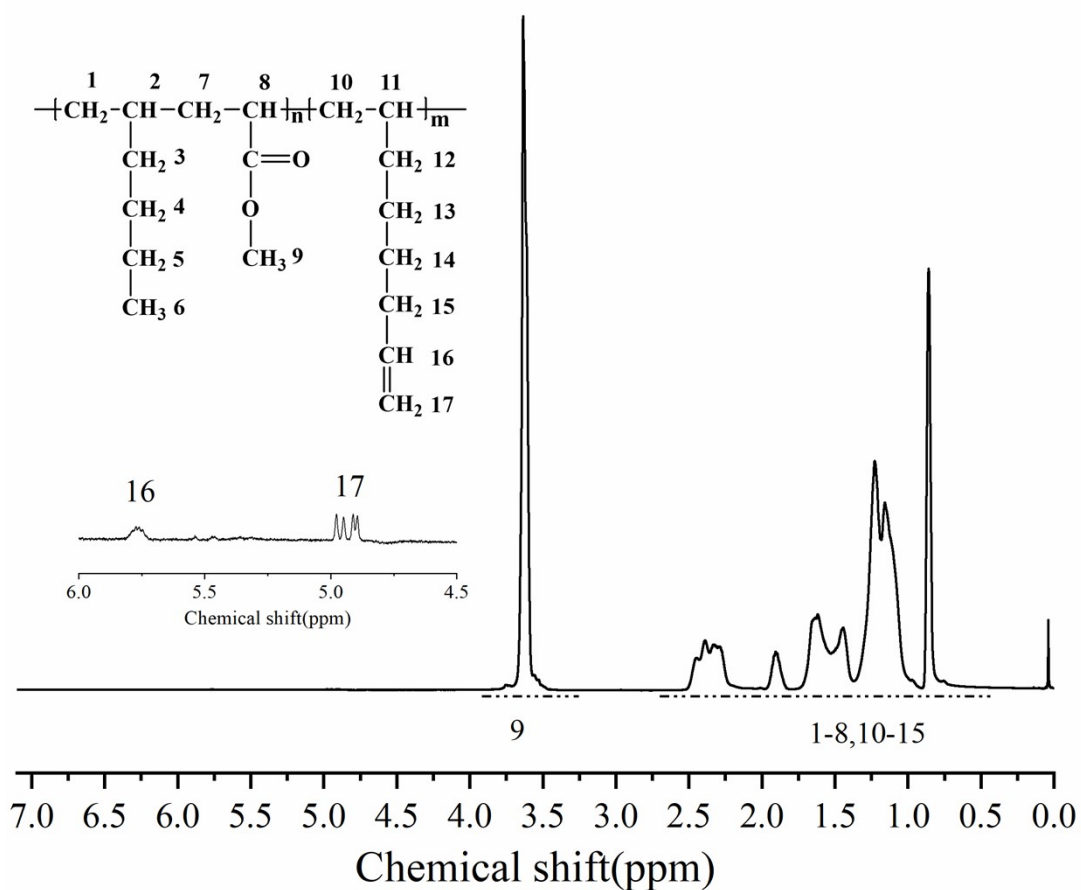

Figure S2.  $^1\text{H}$  NMR spectrum of copolymer of MA, 1-hexene and 1,7-octadiene in  $\text{CDCl}_3$ .



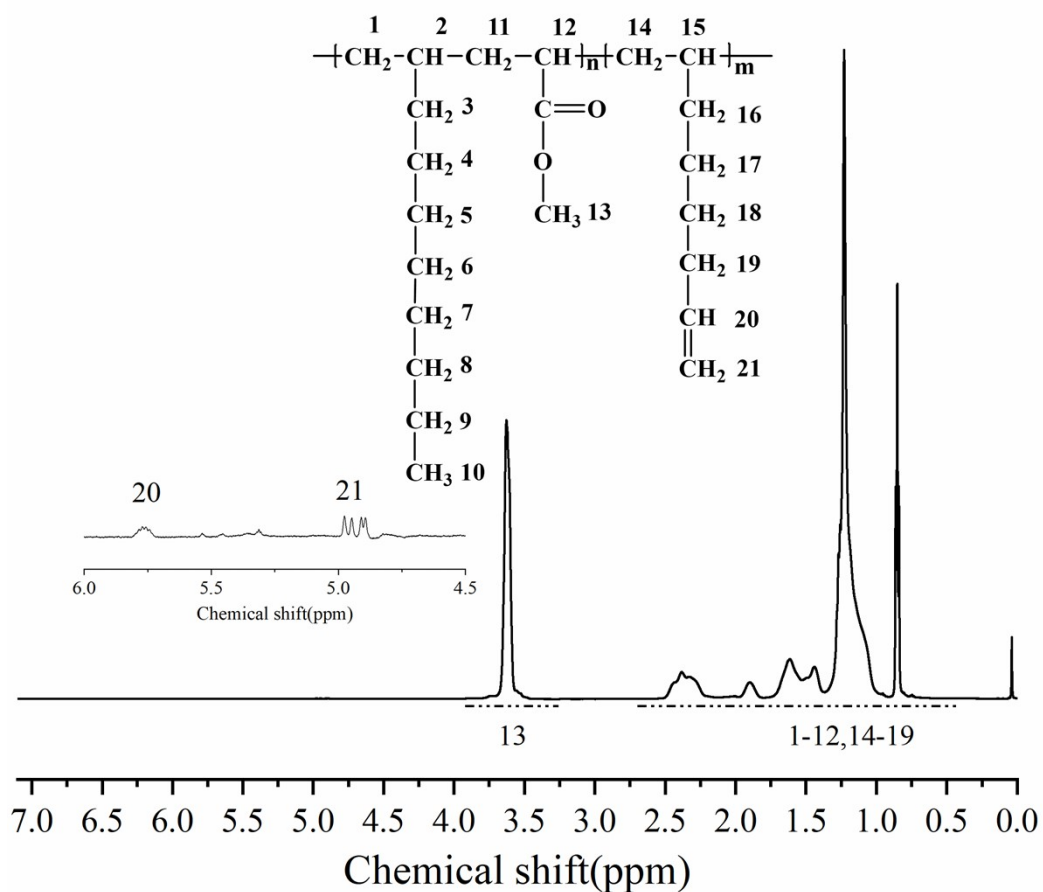

Figure S3.  $^1\text{H}$  NMR spectrum of copolymer of MA, 1-decene and 1,7-octadiene in  $\text{CDCl}_3$ .

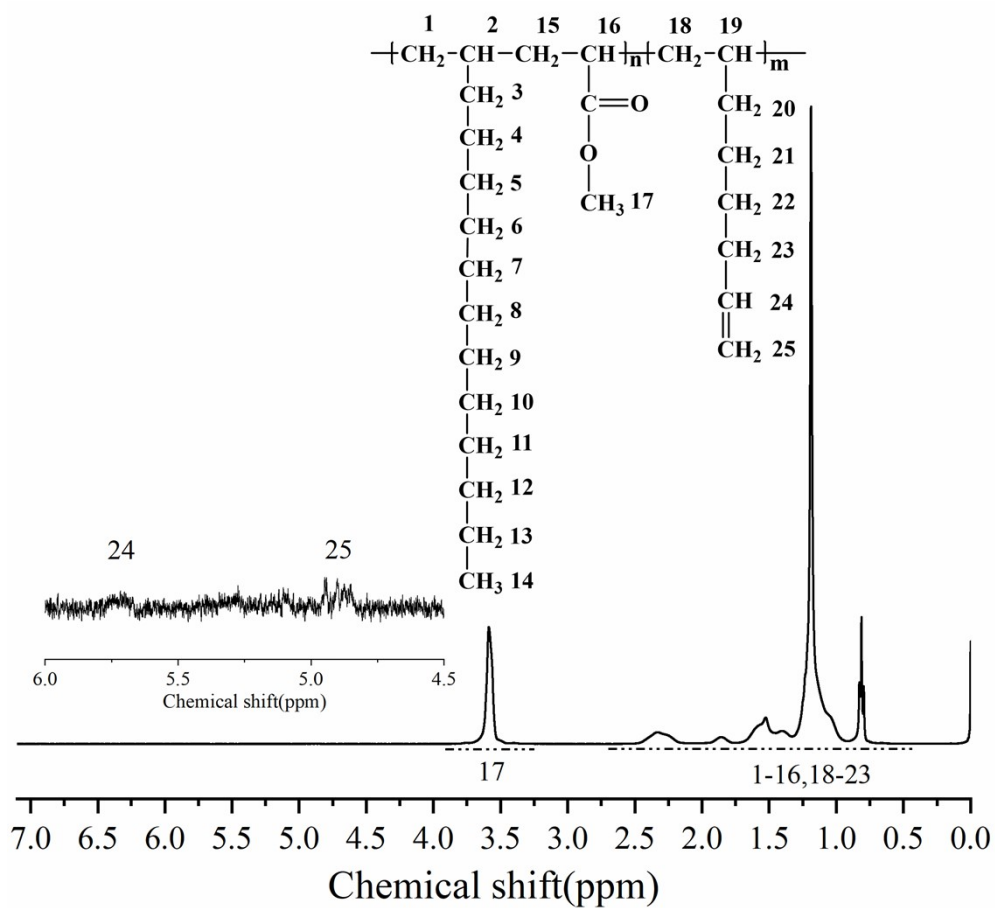

Figure S4.  $^1\text{H}$  NMR spectrum of copolymer of MA, 1-tetradecane and 1,7-octadiene in  $\text{CDCl}_3$ .

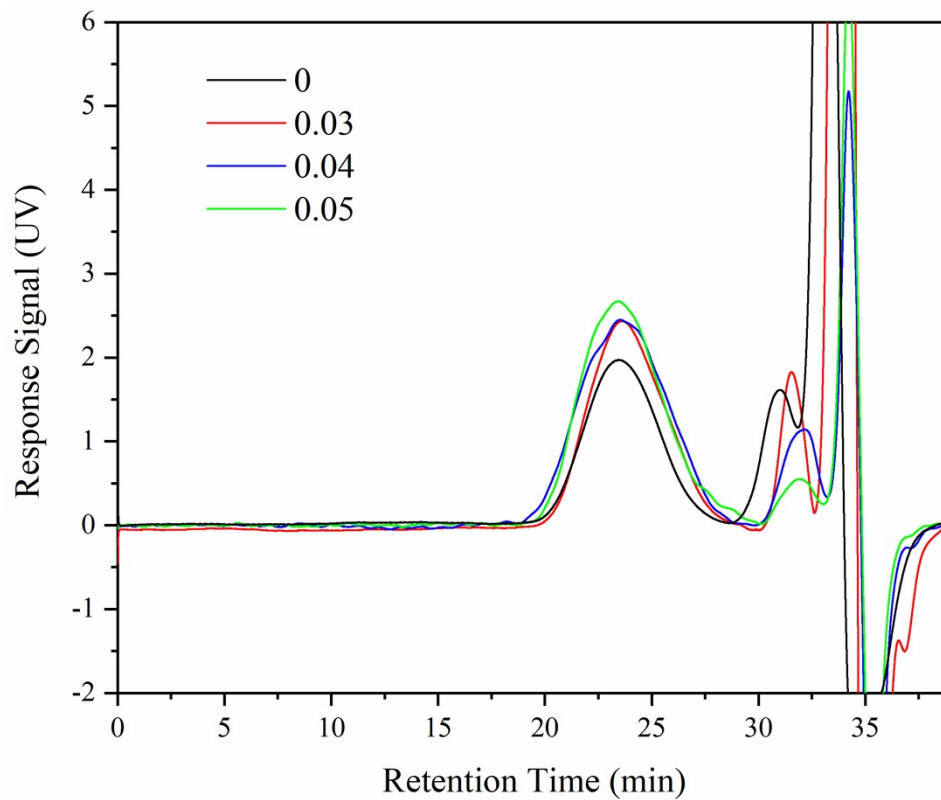

Figure S5. GPC curves of copolymers with different 1,7-octadiene/MA molar ratio. Reaction conditions:  $n(\text{Sc}(\text{OTf})_3)/n(\text{MA})=0.1$ ;  $n(1\text{-octene})/n(\text{MA})=2.87$ ;  $n(\text{ABVN})/n(\text{Monomer})=0.001$ ; temperature 45 °C.

Equation S1. The equations for calculating the composition of the obtained MA, 1-octene and 1,7-octadiene copolymer.

$$F_{MA} = \frac{\frac{S_{11}}{3}}{\frac{S_{11}}{3} + \frac{S_{1-10,12-17} - S_{18} \times 11 - S_{11}}{16} + S_{18}} \times 100\% \quad \text{Eq. S1-1}$$

$$F_{1-octene} = \frac{\frac{S_{1-10,12-17} - S_{18} \times 11 - S_{11}}{16}}{\frac{S_{11}}{3} + \frac{S_{1-10,12-17} - S_{18} \times 11 - S_{11}}{16} + S_{18}} \times 100\% \quad \text{Eq. S1-2}$$

$$F_{1,7-octadiene} = \frac{S_{18}}{\frac{S_{11}}{3} + \frac{S_{1-10,12-17} - S_{18} \times 11 - S_{11}}{16} + S_{18}} \times 100\% \quad \text{Eq. S1-3}$$

$F_{MA}$ : molar content of MA units in the copolymer,  $F_{1-octene}$ : molar content of 1-octene units in the copolymer,  $F_{1,7-octadiene}$ : molar content of 1,7-octadiene units in the copolymer.  $S_{11}$  represents the integrated area of H on  $C_{11}$ ,  $S_{18}$  represents the integrated area of H on  $C_{18}$ , and  $S_{1-10,12-17}$  represents the integrated area of H on  $C_1-C_{10}$  and  $C_{12}-C_{17}$ .

Equation S2. The equations for calculating the composition of the obtained MA, 1-hexene and 1,7-octadiene copolymer.

$$F_{MA} = \frac{\frac{S_9}{3}}{\frac{S_9}{3} + \frac{S_{1-8,10-15} - S_{16} \times 11 - S_9}{12} + S_{16}} \times 100\% \quad \text{Eq. S2-1}$$

$$F_{1-hexene} = \frac{\frac{S_{1-8,10-15} - S_{16} \times 11 - S_9}{12}}{\frac{S_9}{3} + \frac{S_{1-8,10-15} - S_{16} \times 11 - S_9}{12} + S_{16}} \times 100\% \quad \text{Eq. S2-2}$$

$$F_{1,7-octadiene} = \frac{S_{16}}{\frac{S_9}{3} + \frac{S_{1-8,10-15} - S_{16} \times 11 - S_9}{12} + S_{16}} \times 100\% \quad \text{Eq. S2-3}$$

$F_{MA}$ : molar content of MA units in the copolymer,  $F_{1-hexene}$ : molar content of 1-hexene units in the copolymer,  $F_{1,7-octadiene}$ : molar content of 1,7-octadiene units in the copolymer.  $S_9$  represents the integrated area of H on  $C_9$ ,  $S_{16}$  represents the integrated area of H on  $C_{16}$ , and  $S_{1-8,10-15}$  represents the integrated area of H on  $C_1-C_{10}$  and  $C_{10}-C_{15}$ .

Equation S3. The equations for calculating the composition of the obtained MA, 1-decene and 1,7-octadiene copolymer.

$$F_{MA} = \frac{\frac{S_{13}}{3}}{\frac{S_{13}}{3} + \frac{S_{1-12,14-19} - S_{20} \times 11 - S_{13}}{20} + S_{20}} \times 100\% \quad \text{Eq. S3-1}$$

$$F_{1-decene} = \frac{\frac{S_{1-12,14-19} - S_{20} \times 11 - S_{13}}{20}}{\frac{S_{13}}{3} + \frac{S_{1-12,14-19} - S_{20} \times 11 - S_{13}}{20} + S_{20}} \times 100\% \quad \text{Eq. S3-2}$$

$$F_{1,7-octadiene} = \frac{S_{20}}{\frac{S_{13}}{3} + \frac{S_{1-12,14-19} - S_{20} \times 11 - S_{13}}{20} + S_{20}} \times 100\% \quad \text{Eq. S3-3}$$

$F_{MA}$ : molar content of MA units in the copolymer,  $F_{1-decene}$ : molar content of 1-decene units in the copolymer,  $F_{1,7-octadiene}$ : molar content of 1,7-octadiene units in the copolymer.  $S_{13}$  represents the integrated area of H on  $C_{13}$ ,  $S_{20}$  represents the integrated area of H on  $C_{20}$ , and  $S_{1-12,14-19}$  represents the integrated area of H on  $C_1-C_{12}$  and  $C_{14}-C_{19}$ .

Equation S4. The equations for calculating the composition of the obtained MA, 1-tetradecane and 1,7-octadiene copolymer.

$$F_{MA} = \frac{\frac{S_{17}}{3}}{\frac{S_{17}}{3} + \frac{S_{1-16,18-23} - S_{24} \times 11 - S_{17}}{28} + S_{24}} \times 100\% \quad \text{Eq. S4-1}$$

$$F_{1-tetradecane} = \frac{\frac{S_{1-16,18-23} - S_{24} \times 11 - S_{17}}{28}}{\frac{S_{17}}{3} + \frac{S_{1-16,18-23} - S_{24} \times 11 - S_{17}}{28} + S_{24}} \times 100\% \quad \text{Eq. S4-2}$$

$$F_{1,7-octadiene} = \frac{S_{24}}{\frac{S_{17}}{3} + \frac{S_{1-16,18-23} - S_{24} \times 11 - S_{17}}{28} + S_{24}} \times 100\% \quad \text{Eq. S4-3}$$

$F_{MA}$ : molar content of MA units in the copolymer,  $F_{1-tetradecane}$ : molar content of 1-tetradecane units in the copolymer,  $F_{1,7-octadiene}$ : molar content of 1,7-octadiene units in the copolymer.  $S_{17}$  represents the integrated area of H on  $C_{17}$ ,  $S_{24}$  represents the integrated area of H on  $C_{24}$ , and  $S_{1-16,18-23}$  represents the integrated area of H on  $C_1-C_{16}$  and  $C_{18}-C_{23}$ .
